# Supplementary material for: Cognitive Screening in HTLV-1 Infected People Using a Self-Perceived Memory Score and Auditory P300
Source: Research Square preprint supplement (doi:10.21203/rs.3.rs-604555/v1), 2021-07-01
Supplement: Supplementary file 1 [file 00c9a4e3b72e6f227e49ab32.xlsx]

## Sheet: arrc_dataset
PARTICIP	CLASS_HAM	COGDIC	AGE	SEX	EDUC	LATP300	LATDIC	AMPP300	SMS	SMSDIC	LATP300_2
15	1	2	56	2	11	425.59	2	6.01	5	2	422.76
50	1	2	51	2	10	454.95	2	2.49	5	2	456.17
42	1	2	57	1	8	412.67	2	4.34	8	1	412.06
32	1	2	65	1	6	396.93	2	6.78	7	1	397.03
23	1	2	62	2	4	348.99	1	2.07	5	2	348.34
40	1	2	61	1	5	374.22	1	7.44	7	1	375.01
49	1	2	62	1	7	407.02	2	7.42	4	2	406.95
8	1	2	52	1	10	278.35	1	2.37	7	1	280.87
45	1	2	60	1	4	399.45	2	9.3	4	2	398.87
51	1	2	63	1	8	359.08	1	2.95	5	2	358.99
57	1	2	50	1	11	412.04	2	6.41	5	2	410.43
46	1	2	55	1	13	437.87	2	10.17	8	1	438.16
9	1	2	60	1	5	386.84	1	2.42	7	1	385.15
34	1	2	54	2	4	371.7	1	1.65	6	2	374.22
2	1	2	60	1	6	452.61	2	4.72	6	2	451.61
4	2		64	1	4	306.1	1	5.48	8	1	308.12
12	2		52	2	4	369.18	1	4.05	9	1	372.76
3	2		49	1	7	326.29	1	4.41	9	1	326.01
52	2		65	2	11	467.57	2	2.05	6	2	466.99
41	2		58	1	8	391.88	1	4.39	5	2	389.36
11	2		65	2	10	422.16	2	2.42	5	2	420.58
10	2		55	2	8	404.5	2	2.43	7	1	404.35
56	2		53	2	13	404.35	2	2.72	6	2	399.86
60	2		45	1	8	296.01	1	4.65	8	1	302.07
53	2		59	1	8	348.99	1	4.29	6	2	341.42
58	2		52	1	13	356.56	1	3.92	7	1	359.08
14	2		39	1	8	389.36	1	4.29	6	2	390.23
17	2		65	2	8	293.49	1	9.49	8	1	301.18
29	2		48	2	8	328.81	1	2.74	7	1	327.78
24	2		62	1	11	331.33	1	2.95	8	1	332.89
55	2		50	2	11	354.04	1	4.29	7	2	355.56
31	2		49	2	11	280.87	1	3.31	8	1	287.34
47	2		62	1	11	354.04	1	1.72	9	1	348.99
22	2		55	1	13	364.13	1	5.63	7	1	363.99
20	2		47	1	5	356.34	1	6.07	5	2	356.56
300	3	1	40	1	6	346.47	1	7.95	9	1
303	3	1	50	1	11	336.38	1	7.55	8	1
304	3	1	52	2	8	321.24	1	14.55	9	1
305	3	1	40	2	11	333.85	1	2.26	8	1
306	3	1	37	2	11	366.65	1	5.39	7	1
307	3	1	47	1	11	288.49	1	8.89	9	1
308	3	1	64	1	11	290.97	1	3.1	9	1
310	3	1	41	2	11	318.72	1	12.59	9	1
312	3	1	49	1	8	326.29	1	7.01	8	1
313	3	1	63	1	8	288.44	1	10.37	9	1
314	3	1	47	2	6	313.67	1	10.37	9	1
315	3	1	60	1	8	341.42	1	9.7	9	1
316	3	1	44	1	11	354.04	1	2.21	8	1
317	3	1	64	1	4	313.67	1	4.85	9	1
319	3	1	46	1	9	331.33	1	7.01	8	1
320	3	1	65	2	5	311.15	1	5.93	9	1
321	3	1	51	2	11	280.87	1	4.45	7	1
322	3	1	55	2	7	361.61	1	8.89	9	1
323	3	1	53	2	7	328.81	1	1.62	8	1
324	3	1	45	2	11	331.33	1	6.33	8	1
325	3	1	45	2	4	333.85	1	4.04	9	1
326	3	1	47	1	11	351.51	1	11.05	8	1
327	3	1	46	1	4	311.15	1	3.37	9	1
328	3	1	47	2	9	328.81	1	2.56	8	1
329	3	1	51	1	4	343.95	1	4.36	8	1
330	3	1	59	1	0	331.33	1	5.79	7	1
332	3	1	52	1	8	313.19	1	6.2	8	1
333	3	1	65	1	8	346.47	1	7.14	8	1
334	3	1	61	2	4	348.99	1	13.2	9	1
335	3	1	65	1	9	326.29	1	1.75	9	1
336	3	1	52	1	11	303.58	1	7.01	8	1
337	3	1	65	1	16	318.3	1	11.92	9	1
338	3	1	61	1	11	338.9	1	11.52	9	1
339	3	1	65	2	11	343.95	1	7.41	8	1
340	3	1	55	2	11	333.85	1	11.59	9	1
